# Supplementary material
Source: publisher site journal article supplement (https://www.dovepress.com/article/309727)
Supplement: Supplementary file 1 [file get_supplementary_file.php]

## **Supplemental File**

**Notes:** The home vision assessment instructions that were sent out to patients are shown here.

# Guide to In-Home Vision Testing

We are evaluating home vision tests and invite you to participate by checking your vision at home prior to your upcoming eye visit. Testing your vision at home should not be used as a replacement for an in-office test. Participation is optional.

## What You Need to Test Your Vision at Home

- Printed copy of vision chart
- Something to cover the eye like a facial tissue that you cannot see through
- A room with good lighting
- Piece of paper to write down your vision
- You may need someone else to help you test your vision

## Directions:

- Tape the vision test to a wall at eye level 5 feet away. You can use the long side of the paper as a 1 foot ruler.
- Cover one eye. If you use eyeglasses for distance vision, the glasses should be worn during the test.
- Read the letters out loud. Continue to the bottom row or until the letters are too difficult to see.
- Write down the number of the smallest line seen correctly (the line with more than half of the letters correctly identified).
- Now repeat the test with the other eye covered and record the results below:

right eye   left eye

Home Visual Acuity Screening   20/\_\_\_   20/\_\_\_

## After the eye test:

If you received a MyChart message, you can reply to us with your vision. Our technicians may also ask you for these values when they call you for your pre-screening prior to your appointment.
